# Supplementary material
Source: ML conference proceedings conference paper supplement (https://openreview.net/forum?id=ryC6pXobCw)
Supplement: supplementary_material [file main_figure.pdf › cache-steering code/figures/main_figure.pdf]

## Activation steering

 Hidden states     Activation steering vector

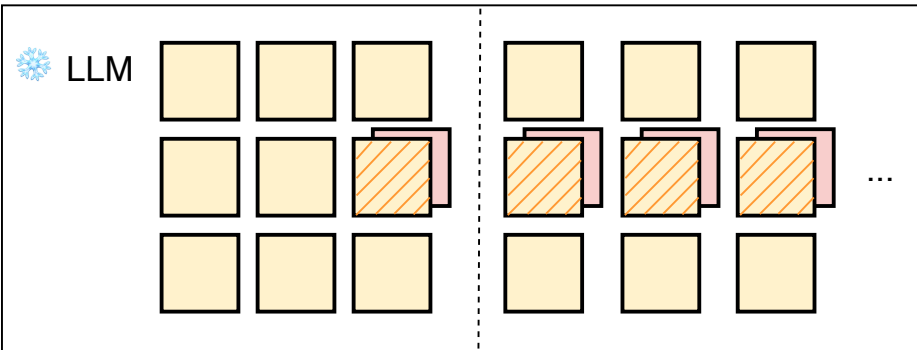

Prompt

Generated tokens

## Cache steering (ours)

 Keys/Values     KV steering vectors

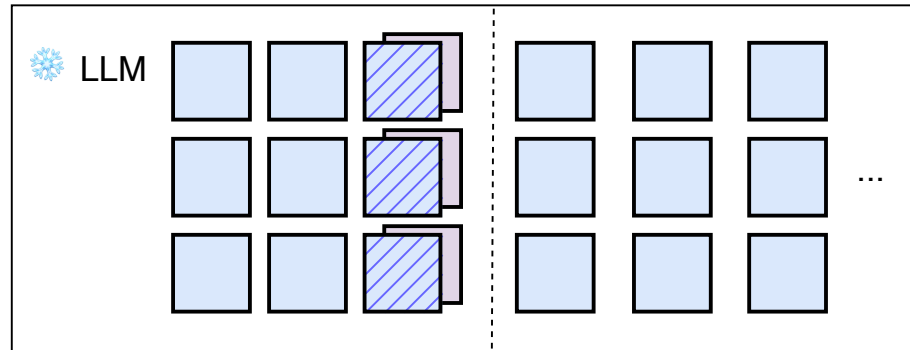

Prompt

Generated tokens
