# Supplementary material
Source: ML conference proceedings conference paper supplement (https://openreview.net/forum?id=ryC6pXobCw)

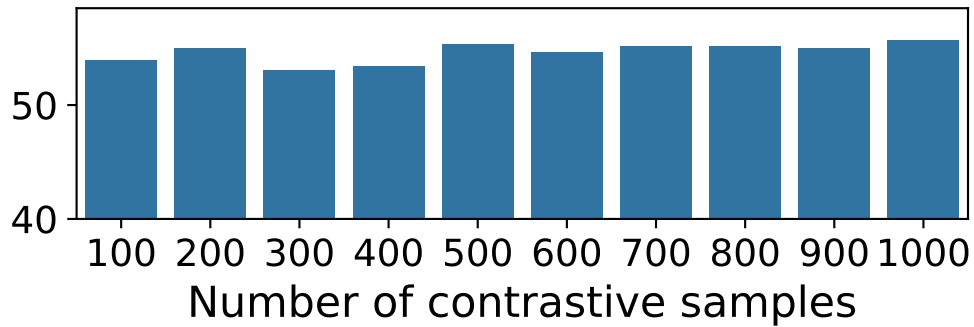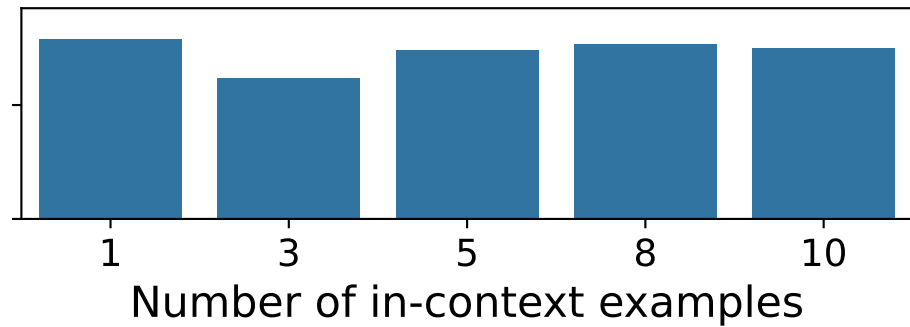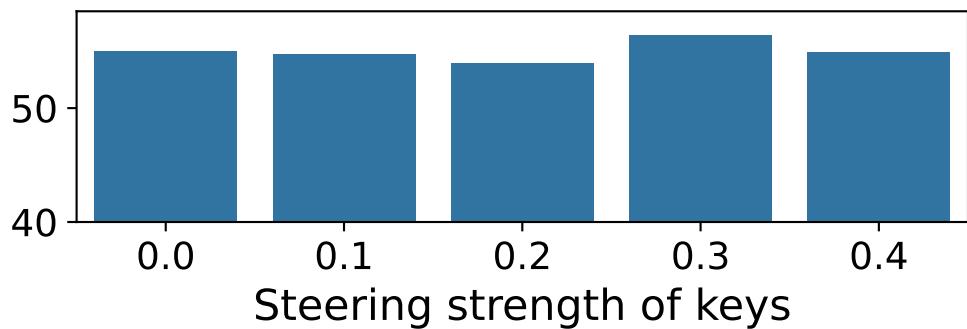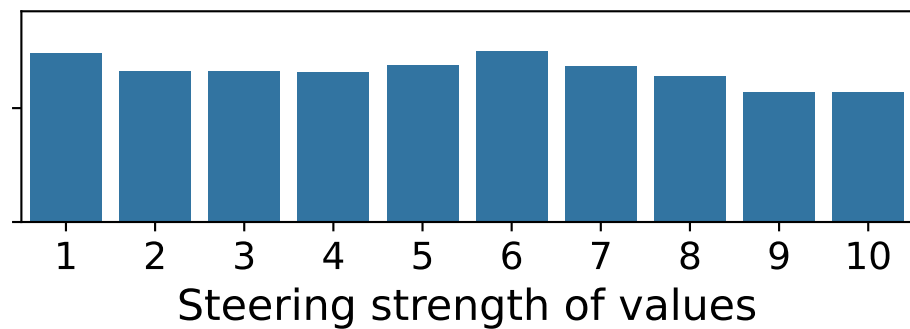

Supplement: supplementary_material [file ablation_results.pdf › cache-steering code/figures/ablation_results.pdf]

ARC-c with Llama-3.2-1B-Instruct

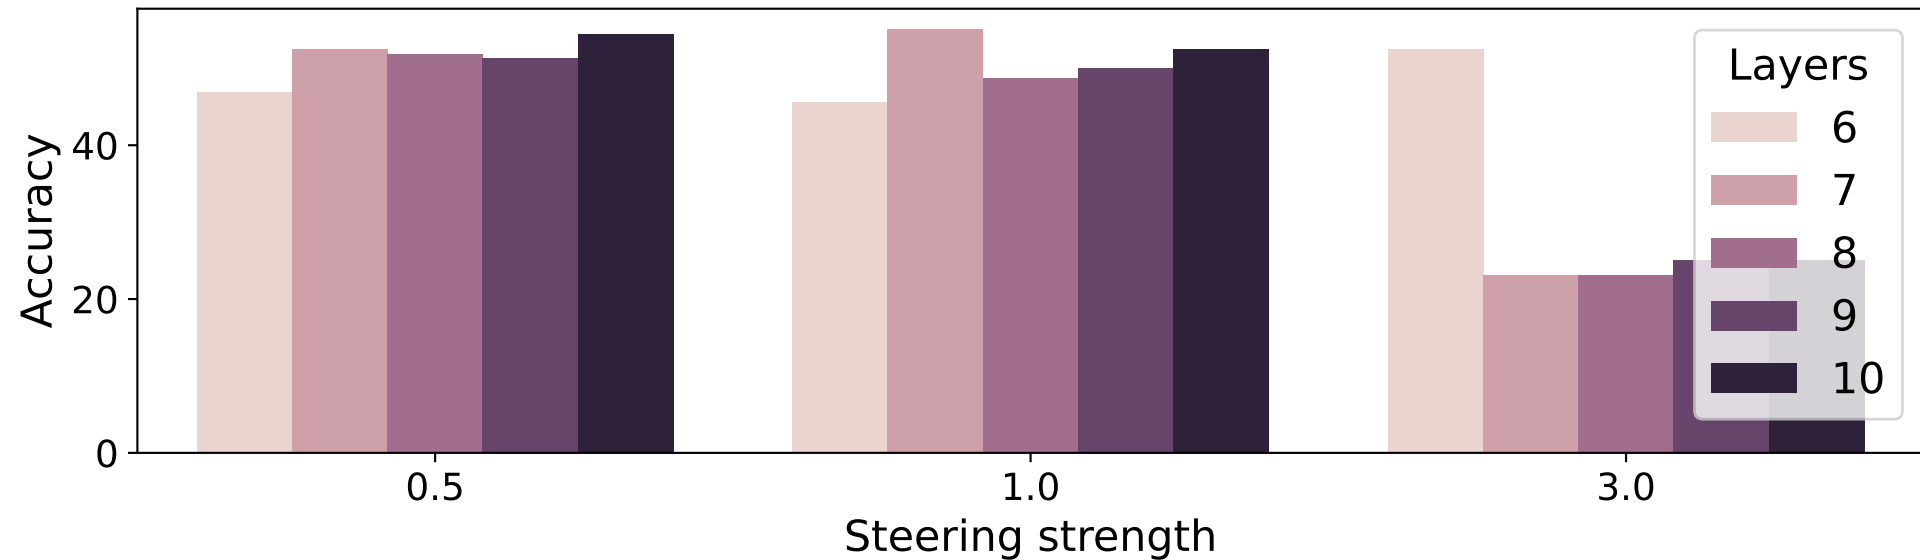

Supplement: supplementary_material [file activation_steering_ablation.pdf › cache-steering code/figures/activation_steering_ablation.pdf]

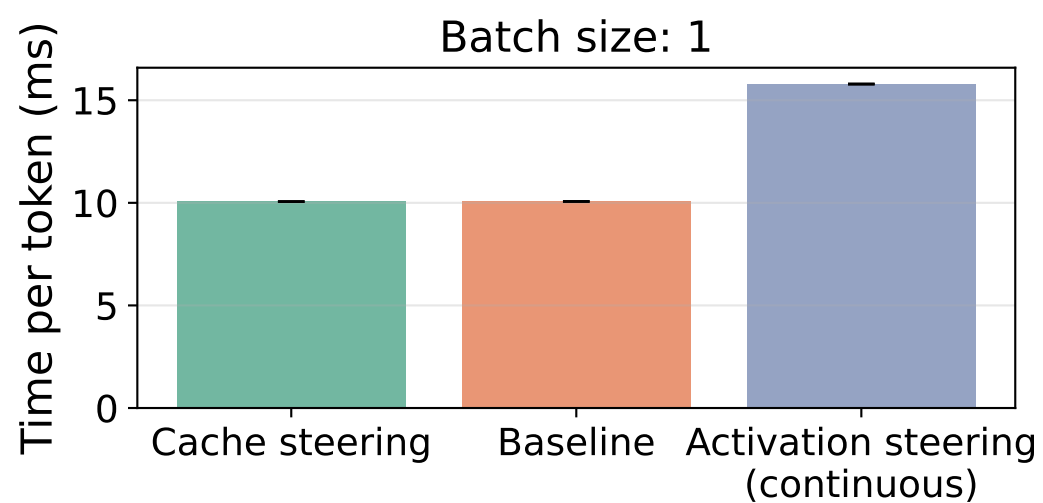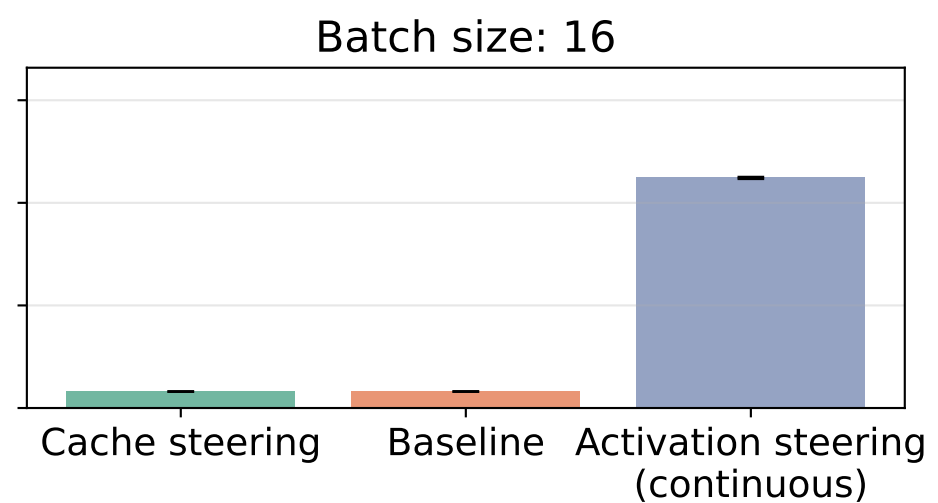

Supplement: supplementary_material [file time_per_token.pdf › cache-steering code/figures/time_per_token.pdf]
